# Supplementary material for: Morphology dependent nonlinear optical and photocatalytic activity of anisotropic plasmonic silver
Source: Royal Society of Chemistry journal article supplement (doi:10.1039/c8ra08893d), 2018-01-01
Supplement: c8ra08893d1.pdf [file c8ra08893d1.pdf]

**A comparison of photo degradation Capability of Anisotropic systems with similar systems found in Literature**

| Catalyst/<br>concentration                                   | Shape               | Dye | Degradation time<br>(Min.) | References   |
|--------------------------------------------------------------|---------------------|-----|----------------------------|--------------|
| AgNPs/30 mL mL <sup>-1</sup>                                 | Spherical           | MB  | 9                          | 1            |
| AgNPs                                                        | Spherical           | MB  | 20                         | 2            |
| AgNPs                                                        | Spherical           | MB  | 12                         | 3            |
| AgNPs/0.03 mg mL <sup>-1</sup>                               | Spherical           | MB  | 5.5                        | 4            |
| AgNPs                                                        | Spherical           | MB  | 3                          | 5            |
| AgNPs/10–100 mg mL <sup>-1</sup>                             | Spherical           | MB  | 8                          | 6            |
| AgNPs/79.78 mL                                               | Spherical           | MB  | 60                         | 7            |
| Fe <sub>3</sub> O <sub>4</sub> @PDA–Ag 5 mg mL <sup>-1</sup> | Spherical           | MB  | 22                         | 8            |
| Fe <sub>3</sub> O <sub>4</sub> @Ag/1.6 mg mL <sup>-1</sup>   | Core shell          | MB  | 6                          | 9            |
| Ag–Fe <sub>3</sub> O <sub>4</sub> @ C core–shell NCs/-       | Spherical           | MB  | 6                          | 10           |
| Ag-NSs/0.001 mg mL <sup>-1</sup>                             | Nano shell          | MB  | 100(s)                     | 11           |
| Silver (1mM/25ml)                                            | Nano sphere colloid | MB  | 480                        | Present work |
|                                                              | Quasi spherical     |     | 320                        |              |
|                                                              | Elliptical          |     | 280                        |              |
|                                                              | Rod                 |     | 220                        |              |
|                                                              | Hexagonal           |     | 110                        |              |
|                                                              | Prism               |     | 20                         |              |

**References**

1. Sinha, T, and Ahmaruzzaman, M. *J. Colloid. Inter. Sci.* 2015, **453**, 115-131.
2. Suvith, V. S., and Daizy Philip. *Spectrochimic. Acta* 2014, **118**, 526-532.
3. Rajan, A, Vidya V, and Daizy P. *J. Mol. Liquids* 2015, **207**, 231-236.
4. Joseph, S, and Beena M. *J. Mol. Liquids* 2015, **204**, 184-191.
5. Bogireddy, N. Kumar R, Hoskote A, Kiran K, and Badal K, Mandal. *J. Environ. Chem. Engg.* 2016, **4(1)**, 56-64.
6. Vidhu, V. K., and Daizy Philip. *Spectrochim. Acta Part A: Molecular and Biomolecular Spectroscopy*, 2014, **117**, 102-108.
7. Wunder, S, Frank P, Yan L, Yu M, and Matthias B, *J. Phys. Chem. C* 2010, **114(19)**, 8814-8820.
8. Xie Y, Bin Y, Haolan X, Jian C, Qingxia L, Yonghong D, and Hongbo Z. *ACS. Appl. Mater. Interfaces.* 2014, **6(11)**, 8845-8852.
9. Sharma, G, and Pethaiyan J. *Eur J. Inorg. Chem.* 2013, **36**, 6126-6136.
10. Zhu M, Chengjiao W, Dehai M, and Guowang D. *J. Mater. Chem. A* 2013, **1(6)** 2118-2125.

11. Vellaichamy Balakumar and Prakash Periakaruppan. *RSC Adv.* 2016,. **6(38)** 31653-31660
